# Supplementary figures and images for: Genomic organization and evolution of double minutes/homogeneously staining regions with MYC amplification in human cancer
Source: PubMed Central journal article supplement — Nucleic Acids Res. 2014 Jul 17;42(14):9131–45. doi: 10.1093/nar/gku590 (PMC4132716; doi:10.1093/nar/gku590), 2014-07-17

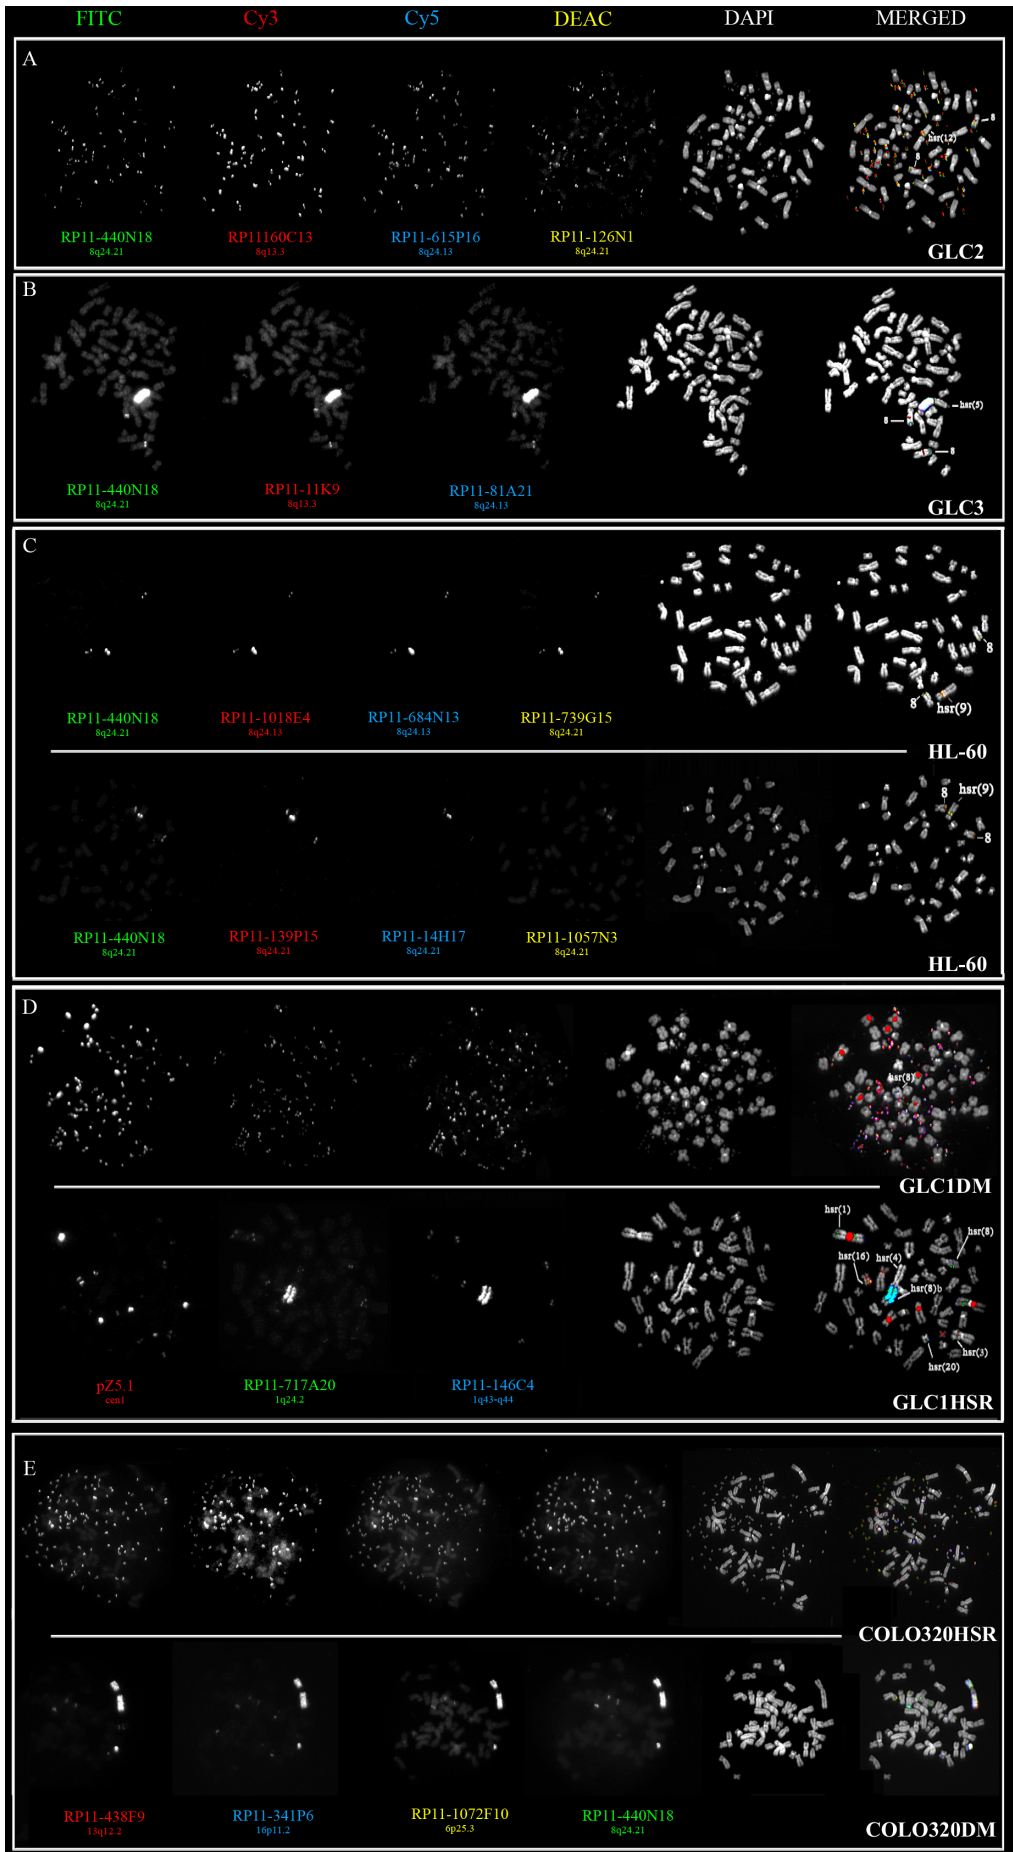

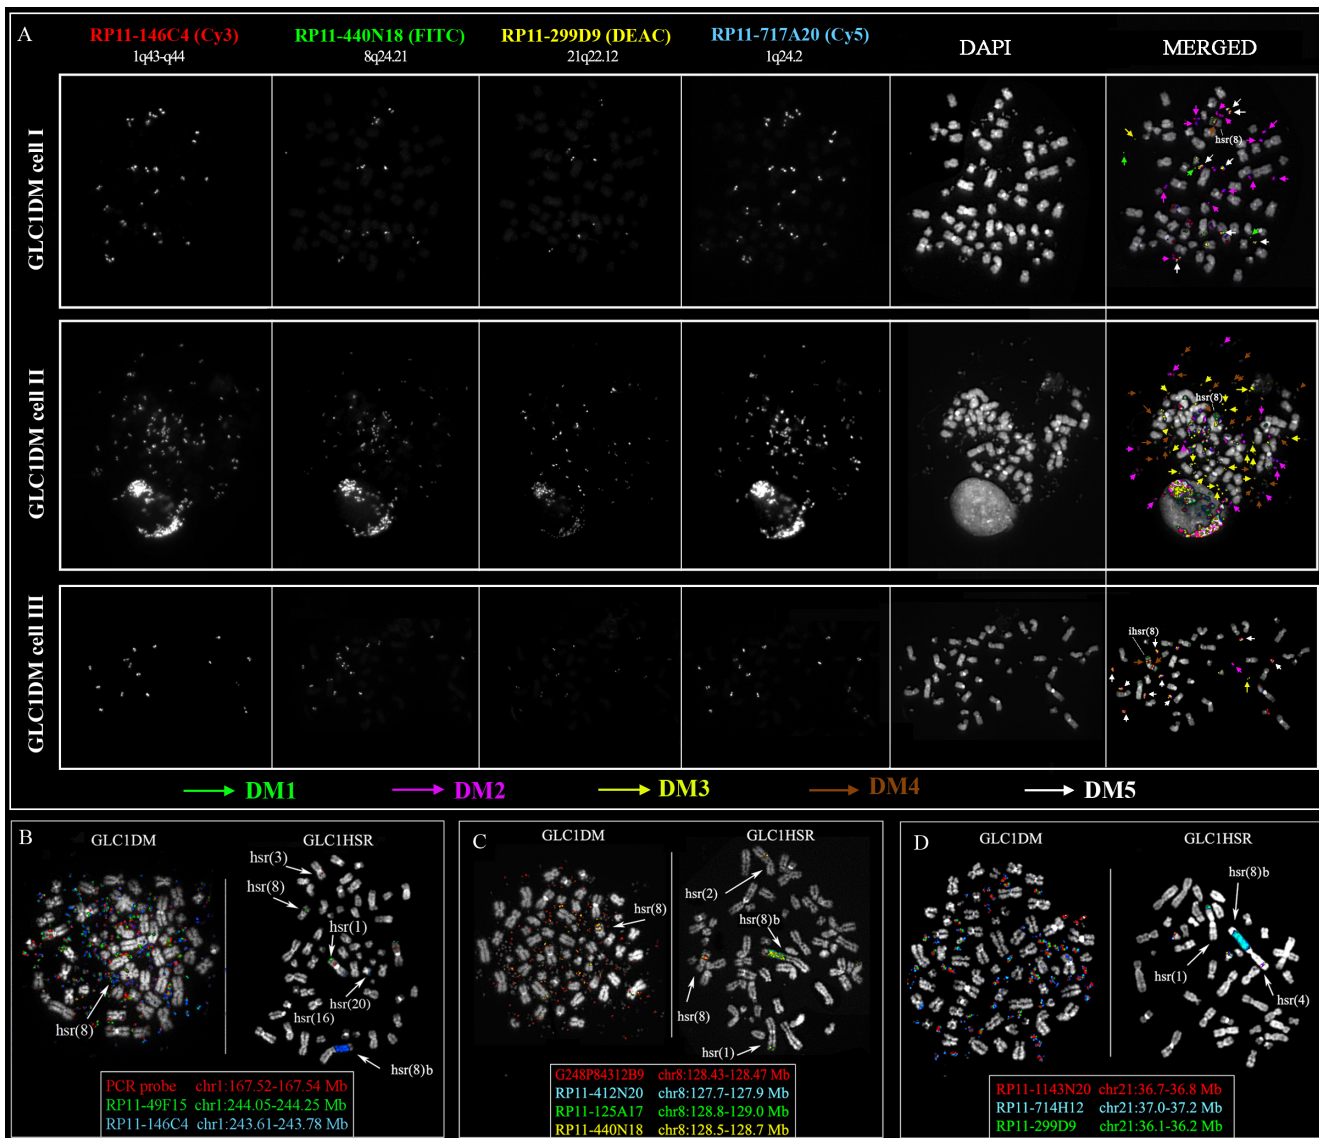

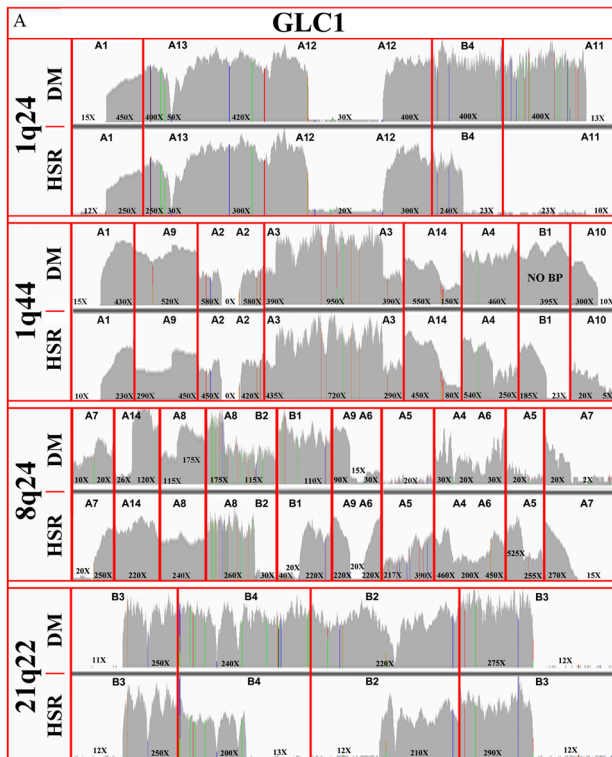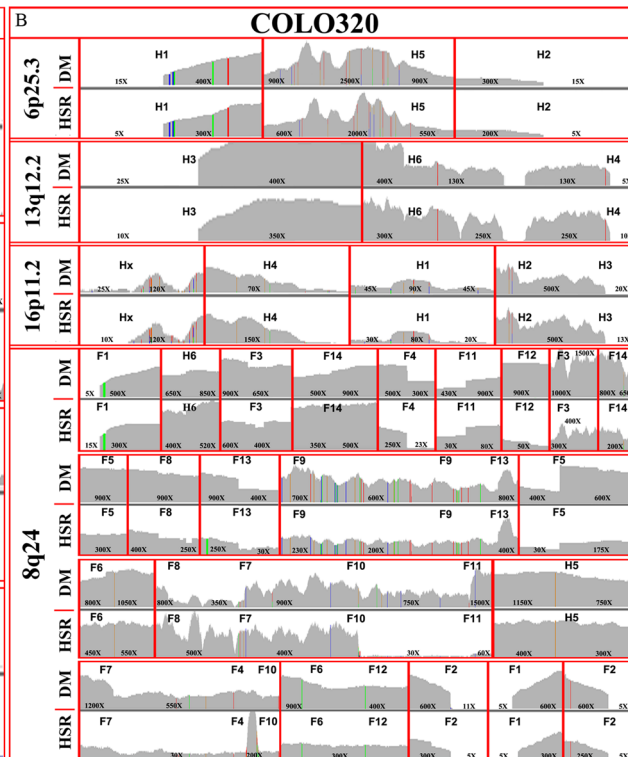

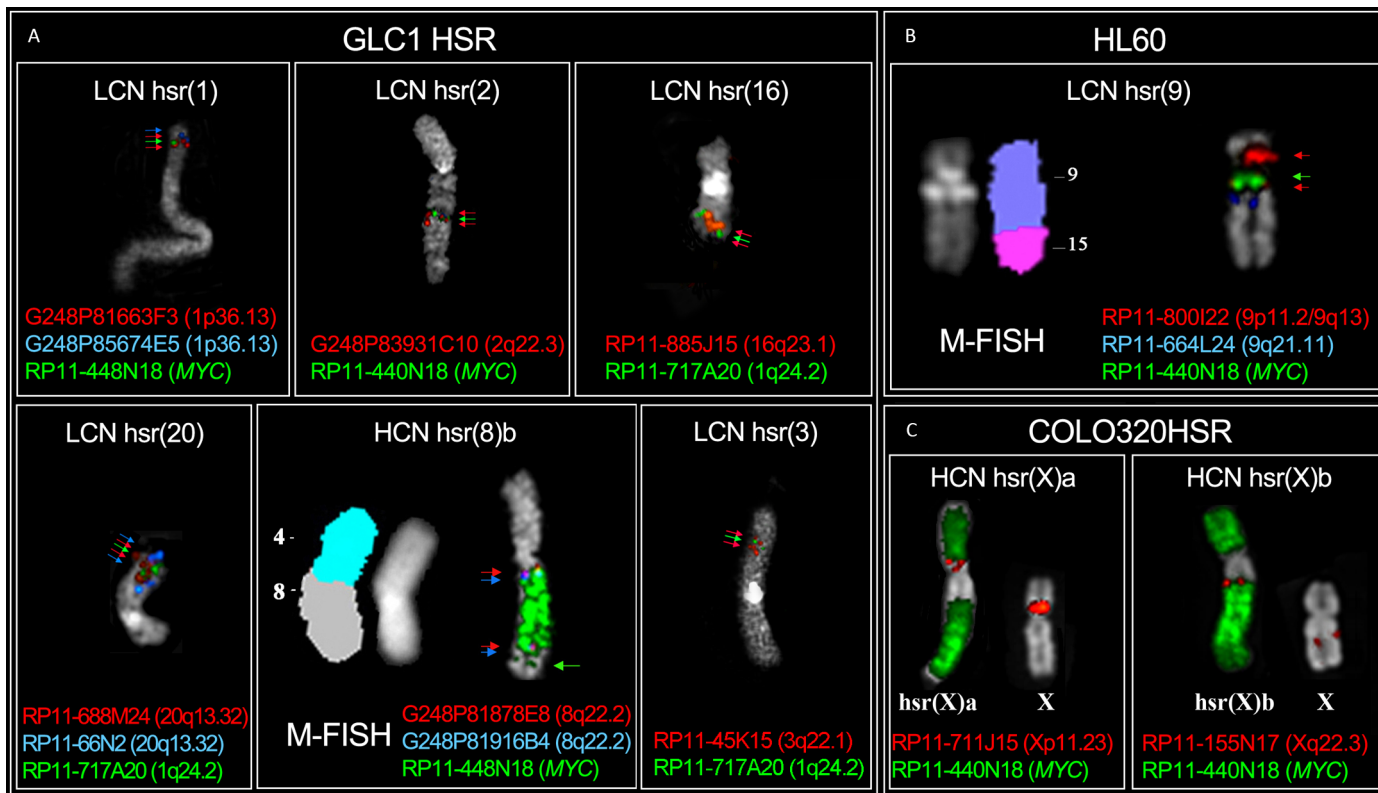

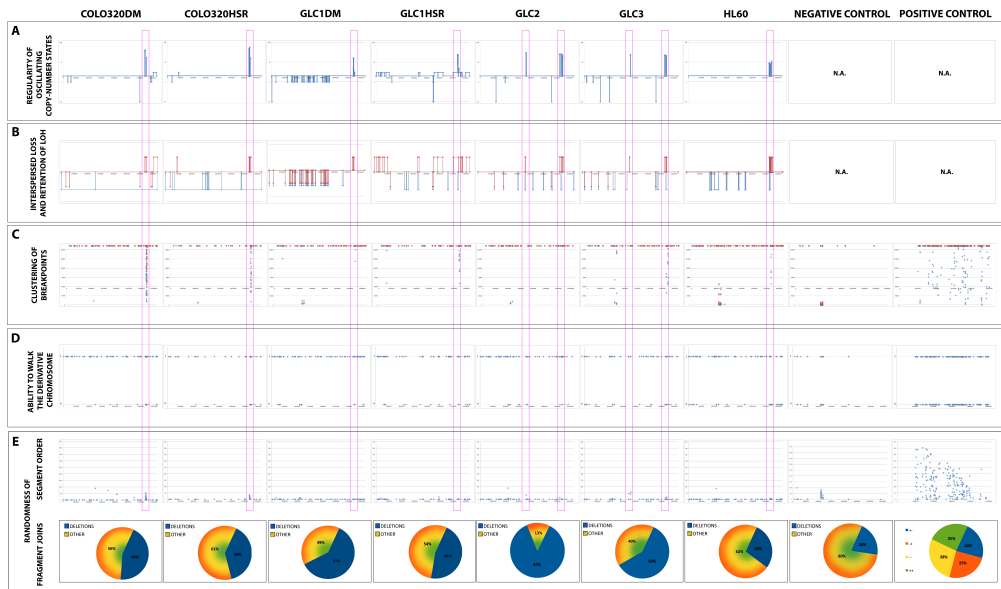

5' PVT1(M34428)/3' EYA1(NM\_172058.2)

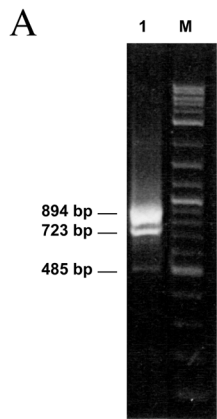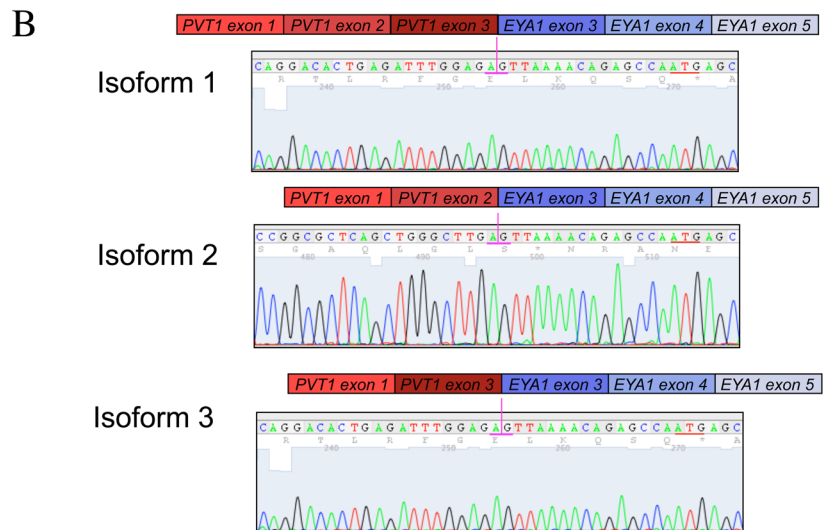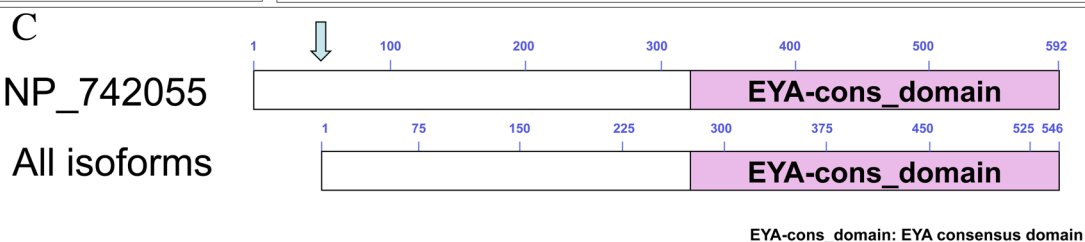

5' PVT1(M34430)/3' AKT3(NM\_005465)

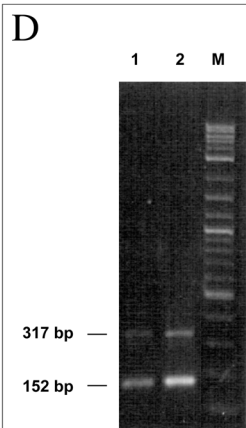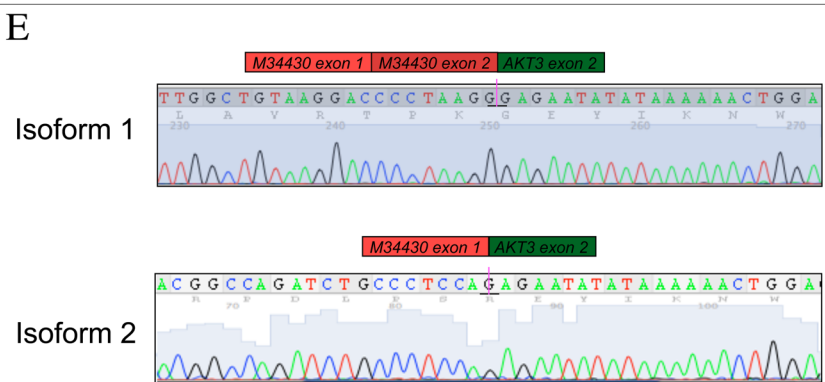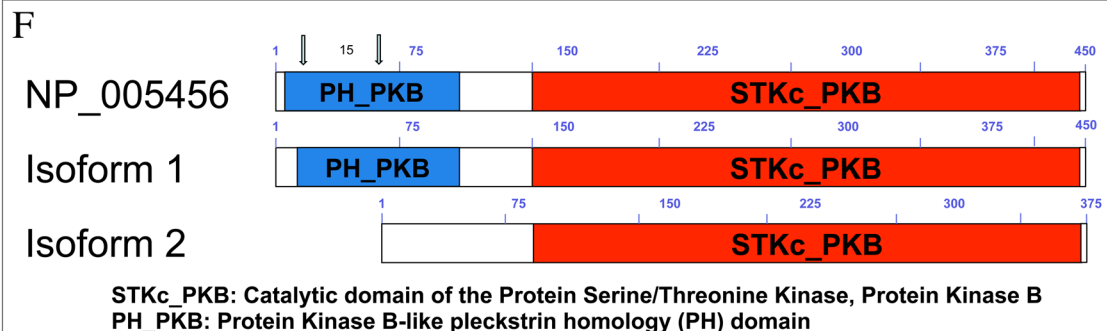

Supplement: supp_gku590_nar-01139-v-2014-File010.pdf [file supp_gku590_nar-01139-v-2014-File010.pdf]
